# Supplementary material for: Modulating the electronic structure of VS2via Ru decoration for an efficient pH-universal electrocatalytic hydrogen evolution reaction
Source: Royal Society of Chemistry journal article supplement (doi:10.1039/d4nr01414f), 2024-01-01
Supplement: d4nr01414f1.pdf [file d4nr01414f1.pdf]

## Supporting Information

### Modulating the electronic structure of Ru *via* VS<sub>2</sub> decoration for efficient pH-universal electrocatalytic hydrogen evolution reaction

Tingxia Wang<sup>a</sup>, Xu Zhang<sup>a</sup>, Xiaojiao Yu<sup>a\*</sup>, Yun Liu<sup>b</sup>, Junpeng Li<sup>a</sup>, Zongbin Liu<sup>a</sup>, Ningning Zhao<sup>a</sup>, Jian Zhang<sup>a</sup>, Jinfen Niu<sup>a</sup> and Qingliang Feng<sup>b\*</sup>

<sup>a</sup> School of Science, Xi'an University of Technology, Xi'an, Shaanxi, 710054, China

<sup>b</sup> Key Laboratory of Special Functional and Smart Polymer Materials of Ministry of Industry and Information Technology, School of Chemistry and Chemical Engineering, Northwestern Polytechnical University, Xi'an 710072, Shaanxi, China

E-mail: yxjw@xaut.edu.cn (Xiaojiao Yu) fengql@nwpu.edu.cn (Qingliang Feng)

(Tingxia Wang and Xu Zhang contributed equally to this work)

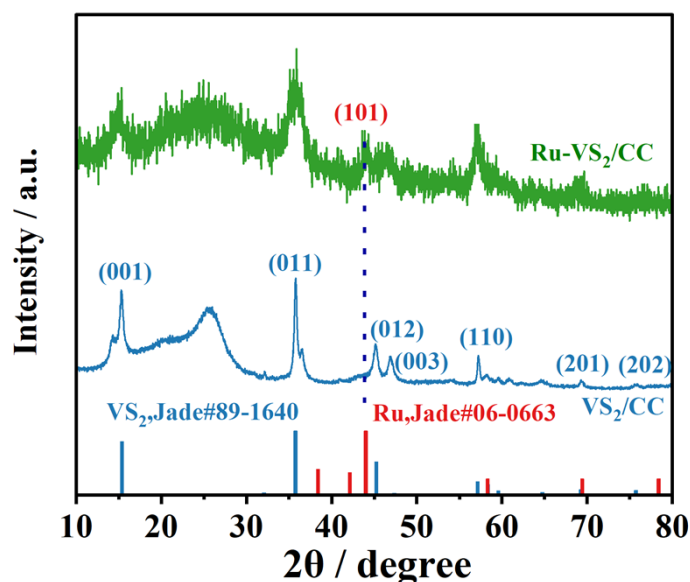

Fig. S1. XRD patterns of the prepared VS<sub>2</sub> and Ru-VS<sub>2</sub>.

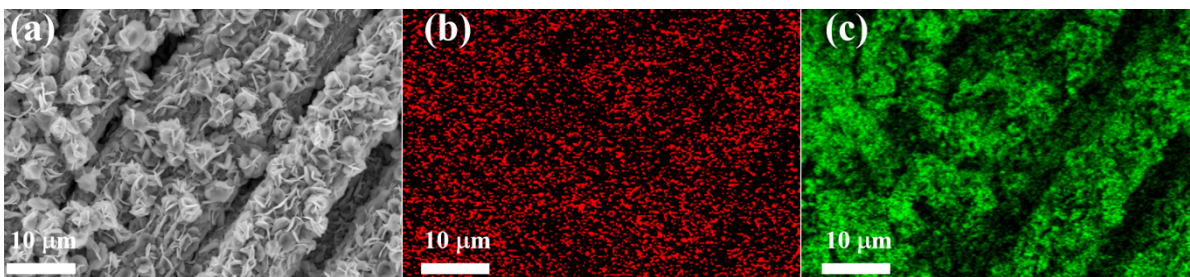

**Fig. S2.** (a) SEM image of  $\text{VS}_2$ . EDS-mapping of (b) V and (c) S in  $\text{VS}_2$ .

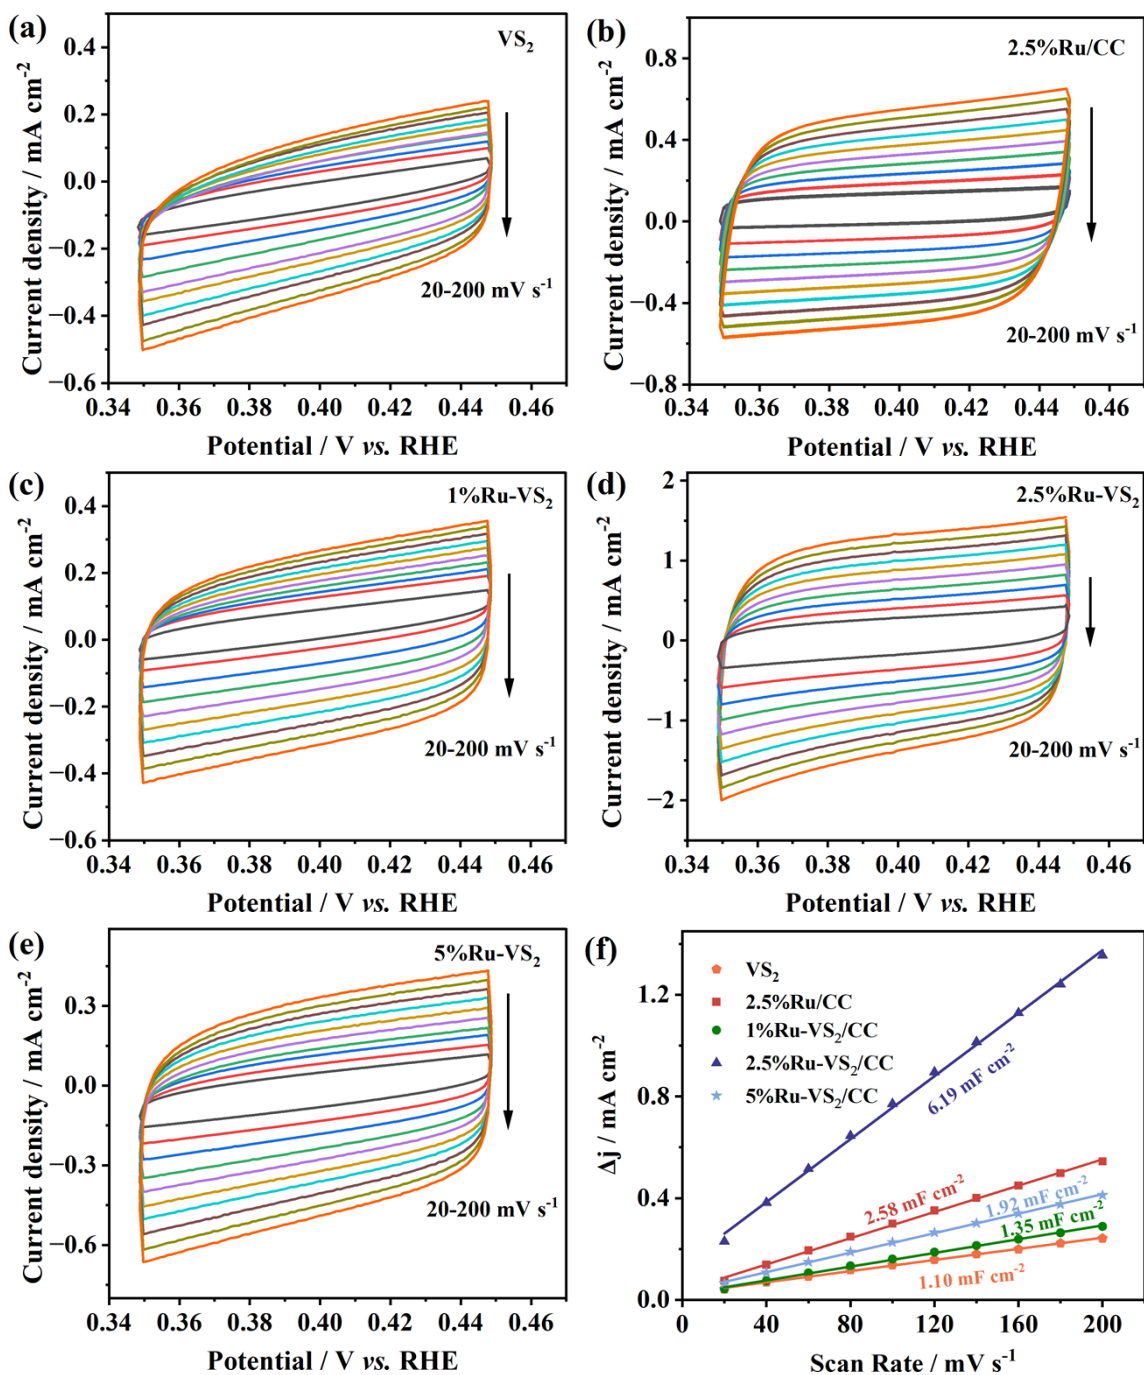

**Fig. S3.** CV curves of (a)  $\text{VS}_2/\text{CC}$ , (b) 2.5%  $\text{Ru}/\text{CC}$ , (c) 1%  $\text{Ru-VS}_2/\text{CC}$ , (d) 2.5%  $\text{Ru-VS}_2/\text{CC}$  and (e) 5%  $\text{Ru-VS}_2/\text{CC}$  samples at scanning rates of 20-200  $\text{mV s}^{-1}$  in a potential

window without faradaic process and (f) the corresponding  $C_{dl}$ .

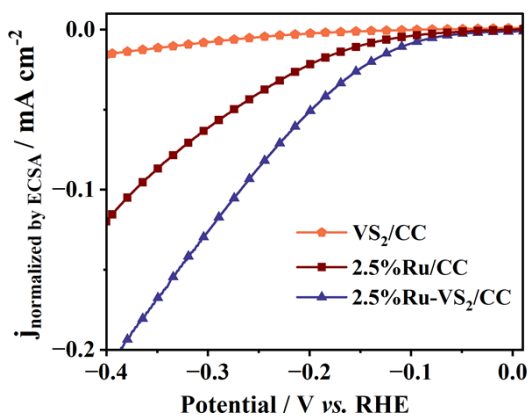

**Fig. S4.** ECSA-normalized LSV curves of VS<sub>2</sub>/CC, 2.5%Ru/CC and 2.5%Ru-VS<sub>2</sub>/CC for HER.

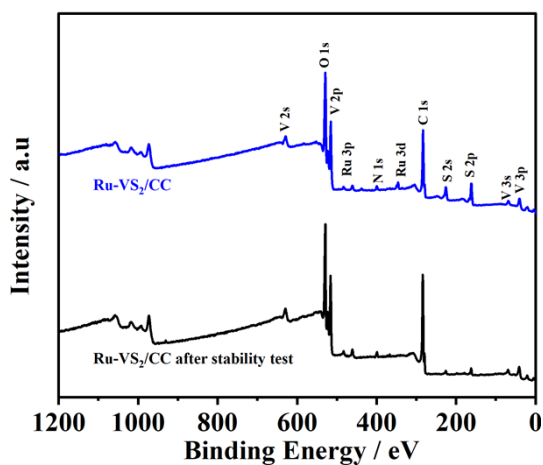

**Fig. S5.** XPS survey of the Ru-VS<sub>2</sub> before and after stability test.

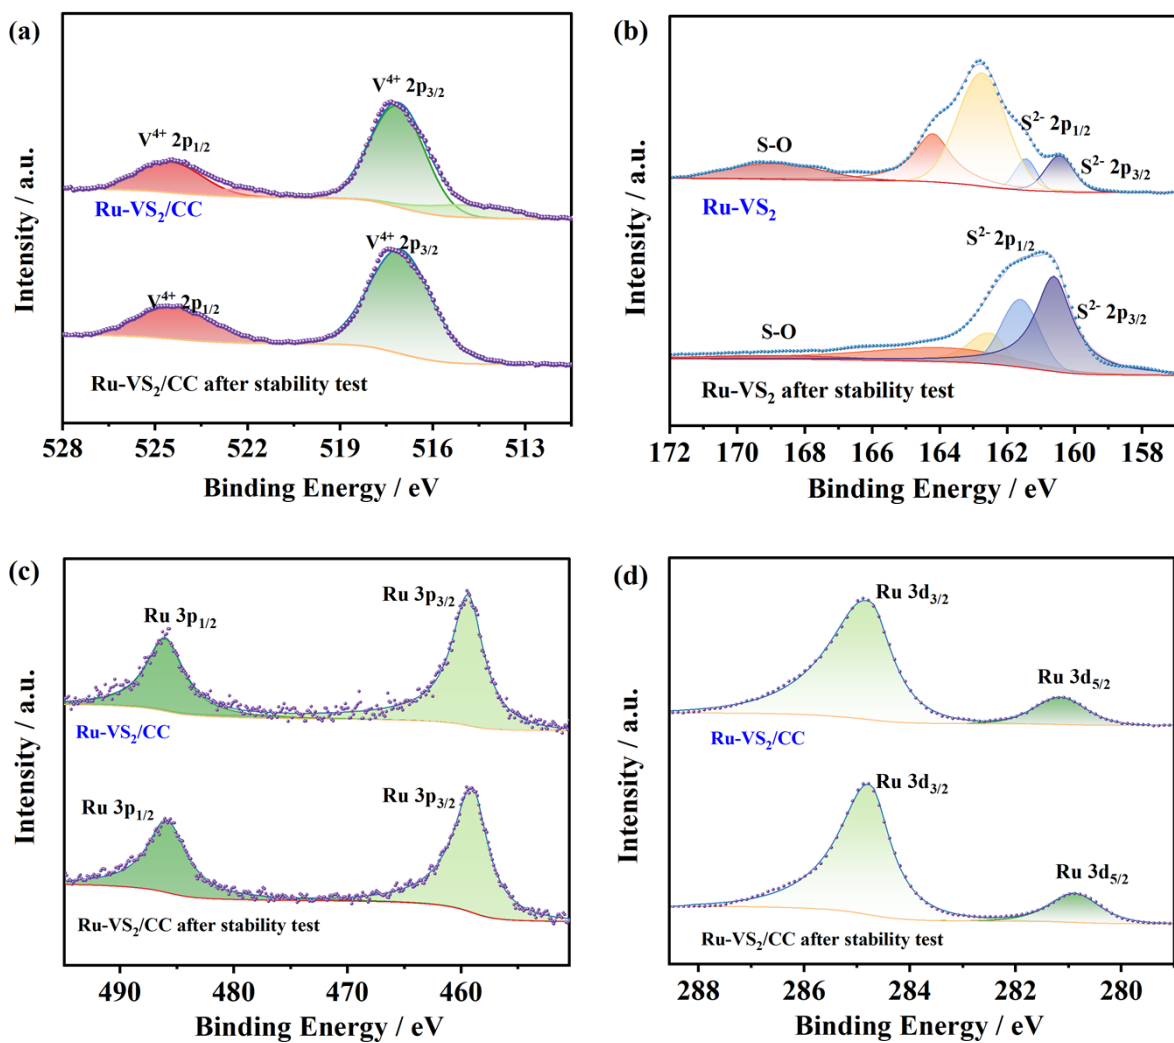

**Fig. S6.** High-resolution XPS spectra of (a) V, (b) S, (c) Ru 3p and (d) Ru 3d of Ru-VS<sub>2</sub> before and after stability test.

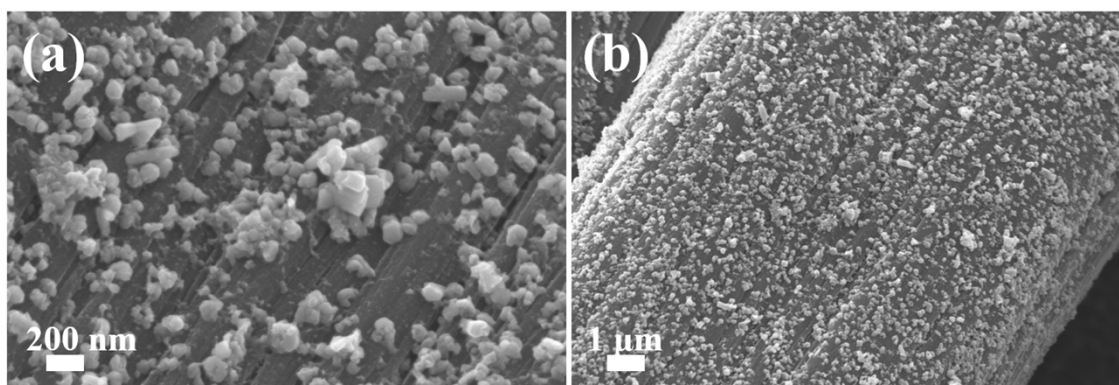

**Fig. S7.** SEM images of Ru-VS<sub>2</sub> after stability test.

**Table S1.** Comparisons of HER activity of 2.5%Ru-VS<sub>2</sub>/CC with other electrocatalysts.

| Electrocatalyst                                    | $\eta_{10}$<br>(mV)       | Tafel slope<br>(mV dec <sup>-1</sup> ) | Electrolyte                          | iR      | Reference |
|----------------------------------------------------|---------------------------|----------------------------------------|--------------------------------------|---------|-----------|
| 2.5%Ru-VS <sub>2</sub> /CC                         | 89                        | 63                                     | 0.5 M H <sub>2</sub> SO <sub>4</sub> |         |           |
|                                                    | 87                        | 71                                     | 1.0 M KOH                            | no      | This Work |
|                                                    | 220                       | 137                                    | 1.0 M PBS                            |         |           |
| 1Pt/Vs <sub>2</sub> /CP                            | 77                        | 44.13                                  | 0.5 M H <sub>2</sub> SO <sub>4</sub> | -       | [1]       |
| 10:MoCo-VS <sub>2</sub> /CC                        | 63                        | 50                                     | 1.0 M KOH                            | yes     | [2]       |
| MoS <sub>2</sub> /VS <sub>2</sub>                  | 199.6                     | 95.2                                   | 0.5 M H <sub>2</sub> SO <sub>4</sub> | yes     | [3]       |
| VS <sub>2</sub> -Mo-10                             | 243                       | 52.6                                   | 0.5 M H <sub>2</sub> SO <sub>4</sub> | yes     | [4]       |
| CoMnS <sub>2</sub> @1T-Fe-VS <sub>2</sub> @NF      | 89                        | 61                                     | 1.0 M KOH                            | yes     | [5]       |
| 2H-VS <sub>2</sub> -Pd                             | 157                       |                                        |                                      |         |           |
|                                                    | (20 mA cm <sup>-2</sup> ) | 75                                     | 0.5 M H <sub>2</sub> SO <sub>4</sub> | yes     | [6]       |
| VS <sub>2</sub> NDs annealed                       | 350                       | 79                                     | 0.3 M H <sub>2</sub> SO <sub>4</sub> | -       | [7]       |
| Bio-templated VS <sub>2</sub>                      | 160                       | 50                                     | 0.5 M H <sub>2</sub> SO <sub>4</sub> | -       | [8]       |
| VS <sub>2</sub>                                    | 68                        | 34                                     | 0.5 M H <sub>2</sub> SO <sub>4</sub> | yes     | [9]       |
| TS-Co <sub>3</sub> O <sub>4</sub> @VS <sub>2</sub> | 175.29                    | 57                                     | 0.5 M H <sub>2</sub> SO <sub>4</sub> | -       | [10]      |
| VS <sub>2</sub>                                    | 58                        | 34                                     | 0.5 M H <sub>2</sub> SO <sub>4</sub> | -       | [11]      |
| self-assembled VS <sub>2</sub>                     | 197                       | 134.39                                 | 1.0 M KOH                            | yes     | [12]      |
| Ru-MoS <sub>2</sub> /CC                            | 169                       | 95                                     | 0.5 M H <sub>2</sub> SO <sub>4</sub> | 85% iR  | [13]      |
|                                                    | 90                        | 130                                    | 1.0 M KOH                            |         |           |
| Ru-MoS <sub>2</sub>                                | 110                       | 78                                     | 0.5 M H <sub>2</sub> SO <sub>4</sub> | no      | [14]      |
|                                                    | 98                        | 65                                     | 1.0 M KOH                            |         |           |
| Ru-MoS <sub>2</sub> /CC                            | 61                        | 114                                    | 1.0 M KOH                            | yes     | [15]      |
| Ru/np-MoS <sub>2</sub>                             | 30                        | 31                                     | 1.0 M KOH                            | -       | [16]      |
| SA-Ru-MoS <sub>2</sub>                             | 76                        | 21                                     | 1.0 M KOH                            | -       | [17]      |
| Ru/Ni-MoS <sub>2</sub>                             | 32                        | 41                                     | 1.0 M KOH                            | no      | [18]      |
| Ru <sub>1</sub> @D-MoS <sub>2</sub>                | 107                       | 96                                     | 1.0 M KOH                            | -       | [19]      |
| Ru-MoSe <sub>2</sub> /CMT                          | 70                        | 39                                     | 1.0 M KOH                            | yes     | [20]      |
| Ru@Ni <sub>3</sub> S <sub>2</sub>                  | 19.8                      | 33.2                                   | 1.0 M KOH                            | 90% iR  | [21]      |
|                                                    | 64                        | 66                                     | 0.5 M H <sub>2</sub> SO <sub>4</sub> |         |           |
| Ru/Mo <sub>2</sub> CT <sub>x</sub>                 | 78                        | 49                                     | 1.0 M KOH                            | 85% iR  | [22]      |
|                                                    | 73                        | 57                                     | 1.0 M PBS                            |         |           |
| Ru-MoP-P <sub>V</sub>                              | 100                       | 49                                     | 0.5 M H <sub>2</sub> SO <sub>4</sub> | 95% iR  | [23]      |
|                                                    | 79                        | 49                                     | 1.0 M KOH                            |         |           |
|                                                    | 161                       | 70                                     | 1.0 M PBS                            |         |           |
| N, Ru Co-doped Sb <sub>2</sub> S <sub>3</sub>      | 72                        | 193                                    | 1.0 M KOH                            | yes     | [24]      |
| Ru@WNO-C                                           | 172                       | 38.9                                   | 0.5 M H <sub>2</sub> SO <sub>4</sub> | 100% iR | [25]      |

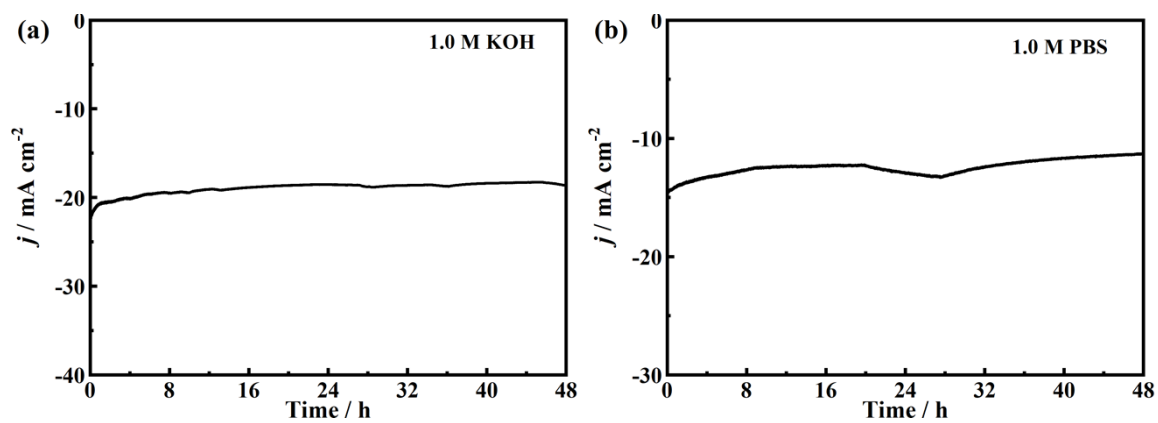

**Fig. S8.** chronoamperometry curves of Ru-VS<sub>2</sub>/CC in (a) 1.0 M KOH and (b) 1.0 M PBS.

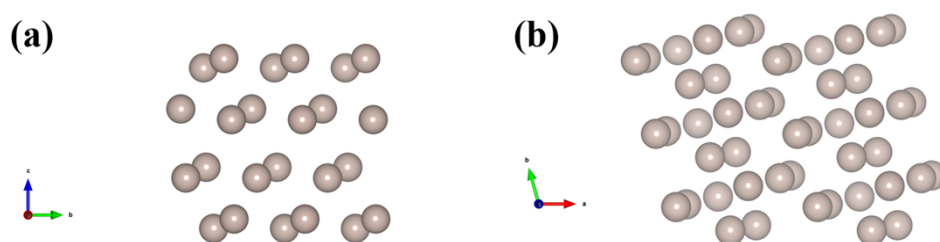

**Fig. S9.** Ball-stick models of VS<sub>2</sub> (a) side view and (b) top view.

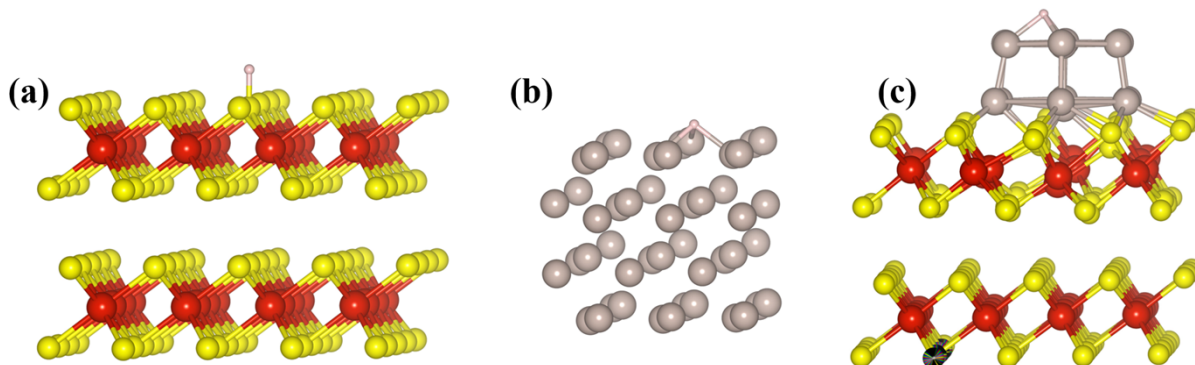

**Fig. S10.** Optimized structure models of H\* adsorbed on the (a) VS<sub>2</sub>, (b) Ru and (c) Ru/VS<sub>2</sub>.



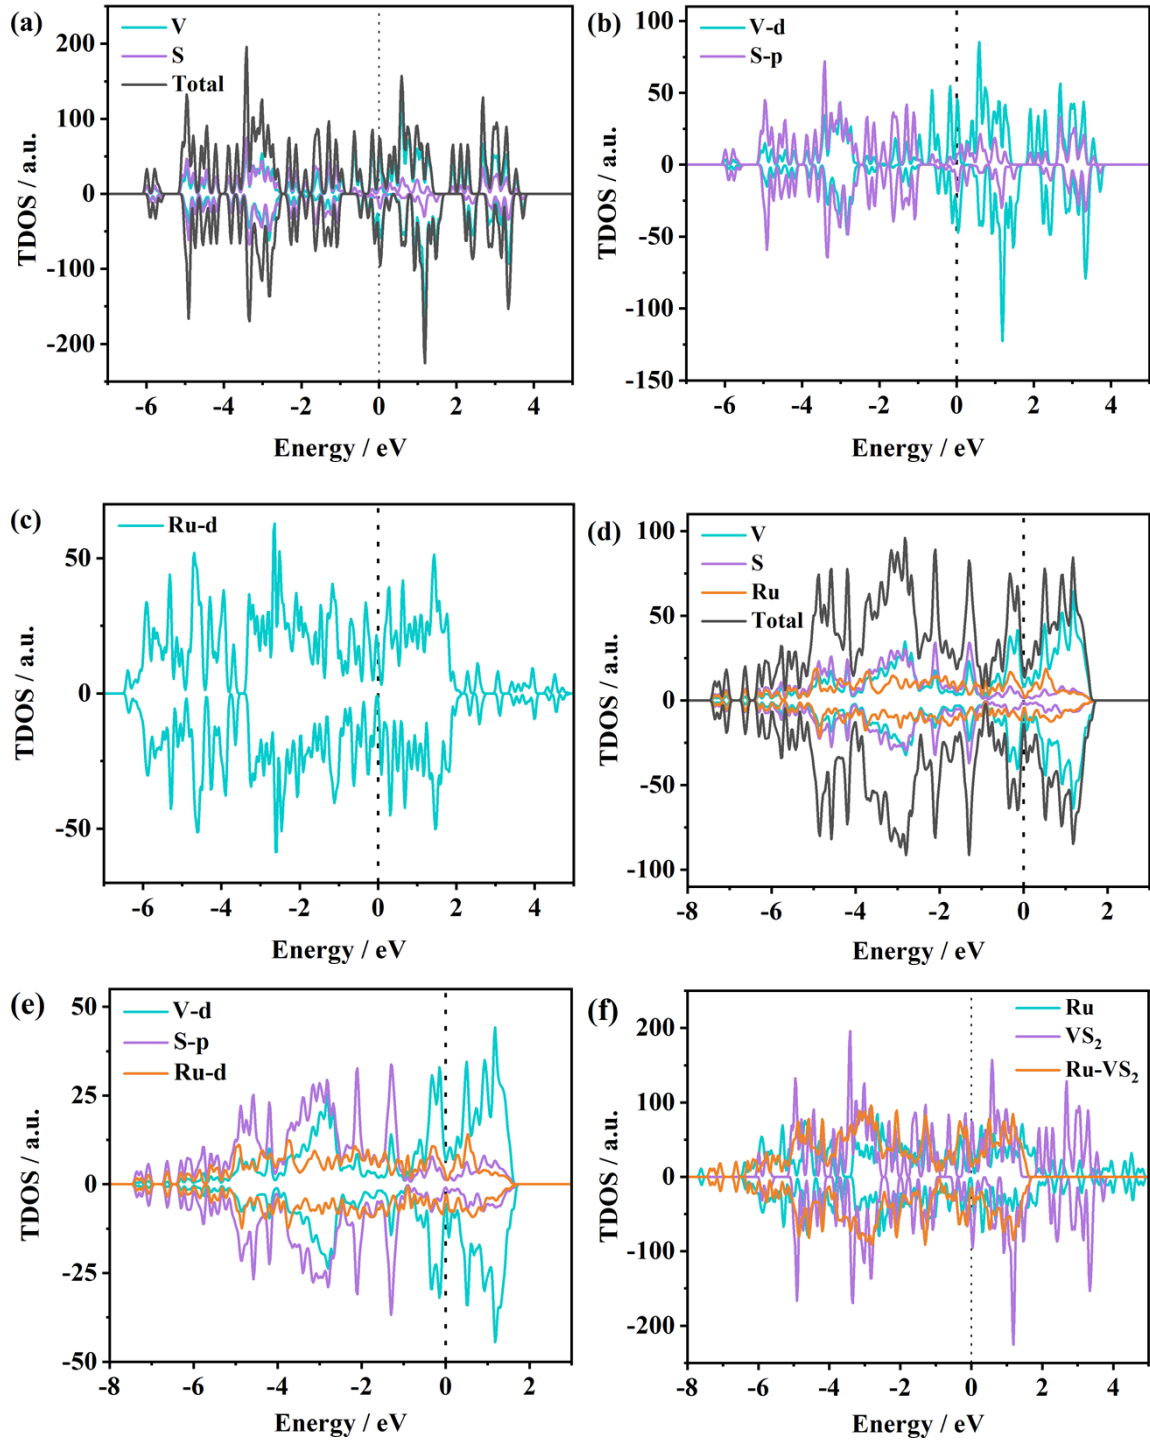

**Fig. S11.** Calculated density of electronic states of (a-b)  $\text{VS}_2$ , (c) Ru, (d-e) Ru/ $\text{VS}_2$  and the comparison of the  $\text{VS}_2$ , Ru and Ru/ $\text{VS}_2$ .

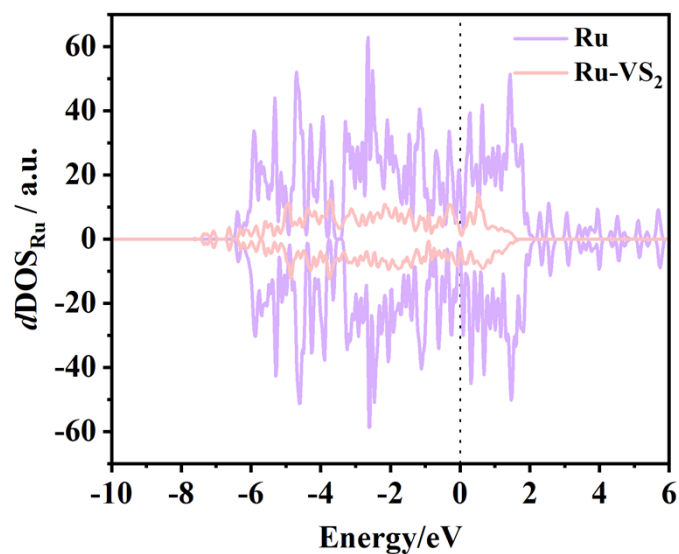

**Fig. S12.** Density of electronic  $d$  states of Ru and Ru/VS<sub>2</sub>.

## References

- [1] J.T. Zhu, L.J. Cai, X.M. Yin, Z. Wang, L.F. Zhang, H.B. Ma, Y.X. Ke, Y.H. Du, S.B. Xi, A.T.S. Wee, Y. Chai, W.J. Zhang, Enhanced electrocatalytic hydrogen evolution activity in single-atom Pt-decorated VS<sub>2</sub> nanosheets, *ACS Nano*, 2020, **14**, 5600-5608.
- [2] V.K. Singh, U.T. Nakate, P. Bhuyan, J.Y. Chen, D.T. Tran, S. Park, Mo/Co doped 1T-VS<sub>2</sub> nanostructures as a superior bifunctional electrocatalyst for overall water splitting in alkaline media, *J. Mater. Chem. A*, 2022, **10**, 9067-9079.
- [3] S.H. Yu, Z. Tang, Y.F. Shao, H.W. Dai, H.Y. Wang, J.X. Yan, H. Pan, D.H.C. Chu, In Situ Hybridizing MoS<sub>2</sub> microflowers on VS<sub>2</sub> microflakes in a one-pot CVD process for electrolytic hydrogen evolution reaction, *ACS Appl. Energy Mater.*, 2019, **2**, 5799-5808.
- [4] W.Y. He, X.J. Zheng, J.F. Peng, H. Dong, J.W. Wang, W. Zhao, Mo-dopant-strengthened basal-plane activity in VS<sub>2</sub> for accelerating hydrogen evolution reaction, *Chem. Eng. J.*, 2020, **396**, 125227.
- [5] P.P. Dhakal, U.N. Pan, D.R. Paudel, M.R. Kandel, N.H. Kim, J.H. Lee, Cobalt-manganese sulfide hybridized Fe-doped 1T-Vanadium disulfide 3D-Hierarchical core-shell nanorods for extreme low potential overall water-splitting, *Materials Today Nano*, 2022, **20**, 100272.
- [6] K. Karthick, T.K. Bijoy, A. Sivakumaran, A.B.M. Basha, P. Murugan, S. Kundu, Enhancing hydrogen evolution reaction activities of 2H-phase VS<sub>2</sub> layers with palladium



nanoparticles, *Inorg. Chem.*, 2020, **59**, 10197-10207.

[7] G.M. Kumar, P. Ilanchezhian, H.D. Cho, D.J. Lee, D. Y.Kim, T.W. Kang, Ultrathin VS<sub>2</sub> nanodiscs for highly stable electro catalytic hydrogen evolution reaction, *Int. J. Energ. Rec.*, 2020, **44**, 811-820.

[8] T.Q. Guo, Y.Z. Song, Z.T. Sun, Y.H. Wu, Y. Xia, Y.Y. Li, J.H. Sun, K. Jiang, S.X. Dou, J.Y. Sun, Bio-templated formation of defect-abundant VS<sub>2</sub> as a bifunctional material toward high-performance hydrogen evolution reactions and lithium-sulfur batteries, *J. Energy Chem.*, 2019, **42**, 34-42.

[9] J.T. Yuan, J.J. Wu, W.J. Hardy, P. Loya, M. Lou, Y.C. Yang, S. Najmaei, M.L. Jiang, F. Qin, K. Keyshar, H. Ji, W.L. Gao, J.M. Bao, J. Kono, D. Natelson, P.M. Ajayan, J. Lou, Facile synthesis of single crystal vanadium disulfide nanosheets by chemical vapor deposition for efficient hydrogen evolution reaction, *Adv. Mater.*, 2015, **27**, 5605-5609.

[10] Z.G. Wang, K. Yu, R. Huang, Z.Q. Zhu, Porous Co<sub>3</sub>O<sub>4</sub> stabilized VS<sub>2</sub> nanosheets obtained with a MOF template for the efficient HER, *CrystEngComm*, 2021, **23**, 5097-5105.

[11] Y.J. Qu, M.M. Shao, Y.F. Shao, M.Y. Yang, J.C. Xu, C.T. Kwok, X.Q. Shi, Z.G. Lu, H. Pan, Ultra-high electrocatalytic activity of VS<sub>2</sub> nanoflowers for efficient hydrogen evolution reaction, *J. Mater. Chem. A*, 2017, **5**, 15080-15086.

[12] S.A. Patil, N.K. Shrestha, H.T. Bui, V.D. Chavan, D-K. Kim, S.F. Shaikh, M. Ubaidullah, H. Kim, H. Im, Solvent modulated self-assembled VS<sub>2</sub> layered microstructure for electrocatalytic water and urea decomposition, *Int. J. Energ. Res.*, 2022, **46**, 8413-8423.

[13] H. Cui, R. Dong, J.C. Zhao, P.F. Tan, J.P. Xie, J. Pan, Ultralow Ru-incorporated MoS<sub>2</sub> nanosheet arrays for efficient electrocatalytic hydrogen evolution in dual-pH, *New J. Chem.*, 2022, **46**, 1912-1920.

[14] S. Geng, J. Sheng, W.W. Yang, F.Y. Tian, M.G. Li, Y.S. Yu, Y.Q. Liu, Y.L. Hou, Activating interfacial S sites of MoS<sub>2</sub> boosts hydrogen evolution electrocatalysis, *Nano Res.*, 2022, **15**, 1809-1816.

[15] D.W. Wang, Q. Li, C. Han, Z.C. Xing, X.R. Yang, Single-atom ruthenium based catalyst for enhanced hydrogen evolution, *Appl. Catal. B Environ.*, 2019, **249**, 91-97.

[16] K. Jiang, M. Luo, Z.X. Liu, M. Peng, D.C. Chen, Y.-R. Lu, T.-S. Chan, F.M.F.D. Groot, Y.W. Tan, Rational strain engineering of single-atom ruthenium on nanoporous MoS<sub>2</sub> for

highly efficient hydrogen evolution, *Nat Commun.*, 2021, **12**, 1687.

[17] J.M. Zhang, X.P. Xu, L. Yang, D.J. Cheng, D.P. Cao, Single-atom Ru doping induced phase transition of MoS<sub>2</sub> and S vacancy for hydrogen evolution reaction, *Small Methods*, 2019, **3**, 1900653.

[18] J.M. Ge, D.B. Zhang, Y. Qin, T. Dou, M.H. Jiang, F.Z. Zhang, X.D. Lei, Dual-metallic single Ru and Ni atoms decoration of MoS<sub>2</sub> for high-efficiency hydrogen production, *Appl. Catal. B Environ.*, 2021, **298**, 120557.

[19] C.G. Lang, W.B. Jiang, C.-J. Yang, H. Zhong, P.R. Chen, Q.L. Wu, X.C. Yan, C.-L. Dong, Y. Lin, L.Z. Ouyang, Y. Jia, X.D. Yao, Facile and scalable mechanochemical synthesis of defective MoS<sub>2</sub> with Ru single atoms toward high-current-density hydrogen evolution, *Small*, 2023, **19**, 2300807.

[20] Y.Q. Xue, Y.Y. Xu, Q. Yan, K. Zhu, K. Ye, J. Yan, Q. Wang, D.X. Cao, G.L. Wang, Coupling of Ru nanoclusters decorated mixed-phase (1T and 2H) MoSe<sub>2</sub> on biomass-derived carbon substrate for advanced hydrogen evolution reaction, *J. Colloid. Interf. Sci.*, 2022, **617**, 594-603.

[21] K.F. Wang, B. Li, J.X. Ren, W.X. Chen, J.H. Cui, W. Wei, P. Qu, Ru@Ni<sub>3</sub>S<sub>2</sub> nanorod arrays as highly efficient electrocatalysts for the alkaline hydrogen evolution reaction, *Inorg. Chem. Front.*, 2022, **9**, 3885-3897.

[22] Y.Z. Wu, L. Wang, T. Bo, Z.F. Chai, J.K. Gibson, W.Q. Shi, Boosting hydrogen evolution in neutral medium by accelerating water dissociation with Ru clusters loaded on Mo<sub>2</sub>CT<sub>x</sub> MXene, *Adv. Funct. Mater.*, 2023, **33**, 2214375.

[23] Q.C. Li, X.Y. Luan, Z.Y. Xiao, W.P. Xiao, G.R. Xu, Z.J. Li, Z.X. Wu, L. Wang, Ultrafast microwave synthesis of Ru-doped MoP with abundant P vacancies as the electrocatalyst for hydrogen generation in a wide pH range, *Inorg. Chem.*, 2023, **62**, 9687-9694.

[24] A. Maiti, S.K. Srivastava, N. Ru codoped pellet drum bundle-like Sb<sub>2</sub>S<sub>3</sub>: an efficient hydrogen evolution reaction and hydrogen oxidation reaction electrocatalyst in alkaline medium, *ACS Appl. Mater. Inter.*, 2020, **12**, 7057-7070.

[25] G. Meng, H. Tian, L.X. Peng, Z.H. Ma, Y.F. Chen, C. Chen, Z.W. Chang, X.Z. Cui, J.L. Shi, Ru to W electron donation for boosted HER from acidic to alkaline on Ru/WNO

sponges, *Nano Energy*, 2021, **80**, 105531.
